# Supplementary material
Source: Elsevier journal article supplement (https://www.sciencedirect.com/science/article/pii/S0034935618300136)
Supplement: mmc1 [file S0034935618300136:mmc1.pdf]

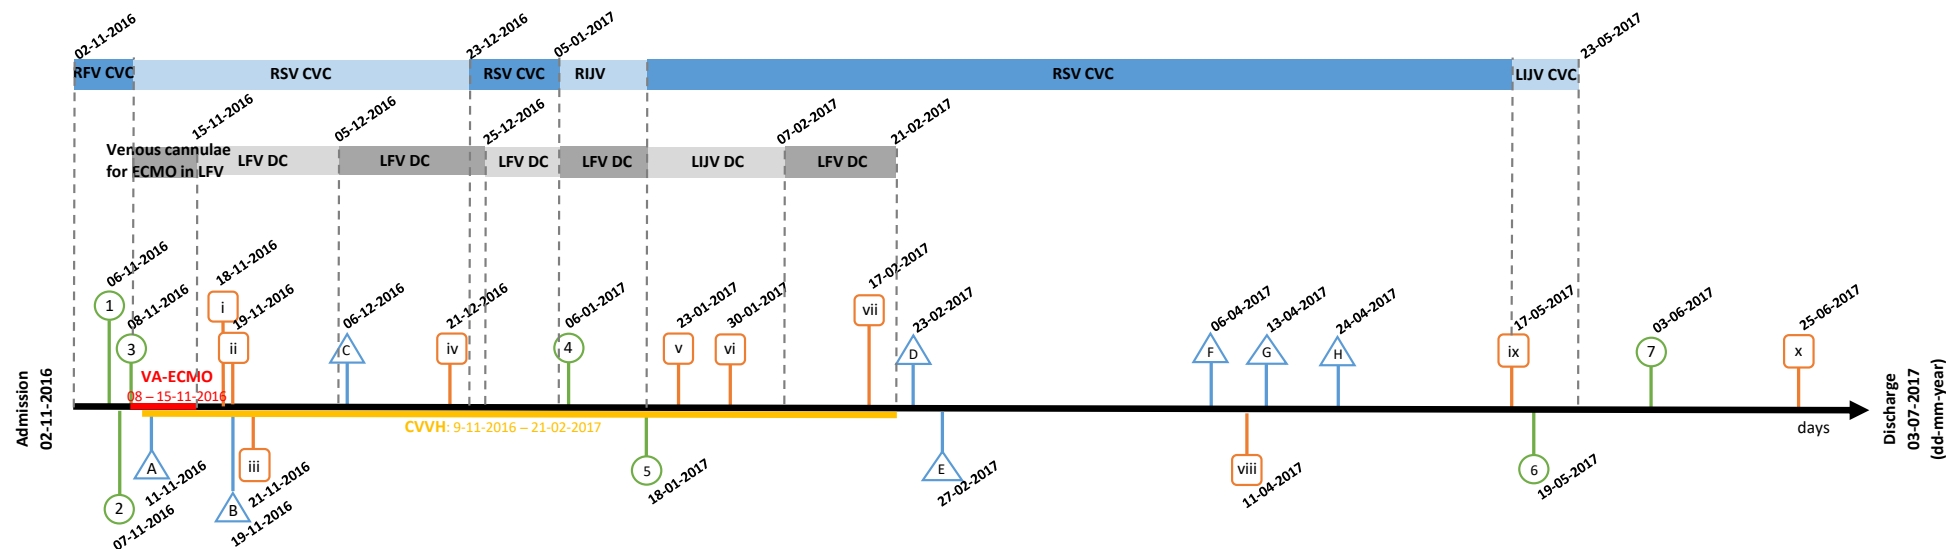

#### Legend:

CT: computed tomography  
 LIJVC: left internal jugular vein  
 TTE: transthoracic echocardiography  
 CVC: central venous catheter  
 RIJVC: right internal jugular vein  
 TEE: transesophageal echocardiography  
 CVVH: continuous veno-venous hemofiltration  
 RFVC: right femoral vein  
 RSV: right subclavian vein  
 VA-ECMO: veno-arterial extracorporeal membrane oxygenation  
 DC: Dialysis catheter  
 LFV: left femoral vein  
 SVC: superior vena cava

- 1 **Necrotizing pneumonia** by *Pseudomonas aeruginosa*
- 2 **Septic shock with multiorgan failure** (cardiovascular, respiratory, renal, hepatic and hematologic).
- 3 **Pulseless electrical activity cardiac arrest:** returned to spontaneous circulation with subsequent cardiogenic shock and poor perfusion of distal limbs.
- 4 **Stage IV sacral pressure ulcer**
- 5 **Methicillin-resistant *Staphylococcus aureus* bacteremia;** Isolation of *Staphylococcus epidermidis* from the tip of the internal jugular CVC
- 6 **Cardiac failure** after removal of mediastinal chest drains
- 7 ***Pseudomonas aeruginosa* bacteremia with septic shock**

- A **TTE:** "Preserved right ventricular systolic function (RVSF), left ventricular ejection fraction (LVEF) <10%."
- B **Chest CT:** "right pneumothorax and emphysematous bullae on upper lobe; right and left moderate pleural effusions". Right thoracic empyema confirmed by chest echo guided aspiration.
- C **TTE:** "Preserved RVSF, LVEF 55%."
- D **Chest CT:** "irregular mass at the tip of the CVC, measuring ~55x7mm and extending from the superior vena cava to the right atrium".  
**TTE:** "new ~60x21mm mass in right atrium".
- E **TEE:** "large polyglobulated mass, ~60x26mm, consistent with an organized thrombus, adherent to the CVC tip and floating in RA, without obstruction of systemic venous flow or tricuspid valve."
- F **TEE:** "similar to previous exam"
- G **TEE:** "similar to previous exam"
- H **Chest CT:** "calcified CRAT of 80x16mm".

- i **Common and superficial right femoral artery raffia by iatrogenic pseudoaneurysm.**
- ii **Insertion of two right chest tube drains:** an apical for pneumothorax, removed on 22-12-2016; and a basal for empyema, until 28-12-2016.
- iii **Left chest drainage** of pleural effusion for 28 days
- iv **Percutaneous tracheostomy**
- v **Infracondilian amputation** of left inferior limb and **distal trans-metacarpal amputation** of left hand.
- vi **Infracondilian amputation** of right inferior limb and **proximal interphalangeal amputation** of all right hand fingers.
- vii **Right posterolateral thoracotomy:** incomplete decortication, due to technical difficulties which led to a successful ventilation of the lower lobe, but leaving behind significant fibrosis of upper and middle lobes.
- viii **Thrombolysis with alteplase**
- ix **Extracorporeal circulating cardiac surgery**
- x **Cranioplasty**
